# Supplementary material for: Computational screening of pyrazine-based graphene-supported transition metals as single-atom catalysts for the nitrogen reduction reaction
Source: Royal Society of Chemistry journal article supplement (doi:10.1039/d4dt01363h), 2024-01-01
Supplement: d4dt01363h1.pdf [file d4dt01363h1.pdf]

## Supporting Information

### **Computational screening of pyrazine-based graphene supported transition metals as single-atom catalysts for nitrogen reduction reaction**

Min Zhang,<sup>a</sup> Caijuan Xia,<sup>a</sup> Lianbi Li,<sup>a</sup> Anxiang Wang,<sup>a</sup> Dezhong Cao,<sup>a</sup> Baiyu Zhang,<sup>b</sup> Qinglong Fang,<sup>a,\*</sup> Xumei Zhao<sup>a,\*</sup>

*<sup>a</sup>School of Science, Xi'an Polytechnic University, Xi'an 710048, Shaanxi, China*

*<sup>b</sup>Materials Department, University of California, Santa Barbara, California 93106-5050, United States*

\* Corresponding authors.

E-mail addresses: qinglong\_fang@xpu.edu.cn (Qinglong Fang);

20191211@xpu.edu.cn (Xumei Zhao).

Note S1. Electrochemical durability of the py-GY support.

The durability of materials is investigated because carbon/nitrogen atoms in py-GY may decompose arising from their own nitrogen reduction reaction (NRR) carbon oxidation reaction (COR) and nitrogen oxidation reaction (NOR). During the real NRR process it is thus crucial to evaluate the possibility of substrate decomposition. The process of degradation on py-GY can be defined as follows:

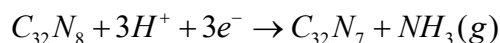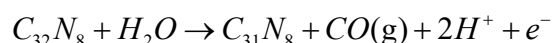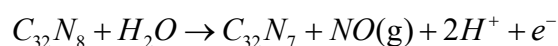

Therefore, the free energy changes for NRR, COR and NOR can be written as

$$\Delta E_d = E_{C_{32}N_7} + E_{NH_3} - 3E_{(H^+ + e^-)} - E_{C_{32}N_8}$$

$$\Delta E_d = E_{C_{31}N_8} + E_{CO} + 2E_{(H^+ + e^-)} - E_{C_{32}N_8} - E_{H_2O}$$

$$\Delta E_d = E_{C_{32}N_7} + E_{NO} + 2E_{(H^+ + e^-)} - E_{C_{32}N_8} - E_{H_2O}$$

$$\Delta G_d = \Delta E_d + \Delta E_{ZPE} - T\Delta S$$

Where  $E_{C_{32}N_8}$ ,  $E_{C_{31}N_8}$  or  $E_{C_{32}N_7}$ ,  $E_{NH_3}$ ,  $E_{(H^+ + e^-)}$ ,  $E_{CO}$ ,  $E_{NO}$  and  $E_{H_2O}$  are the energies of py-GY substrate, decomposed py-GY,  $NH_3$ , ( $H^+ + e^-$ ) pair, CO, NO and  $H_2O$ , respectively. Therefore, the potential of electrochemical decomposition ( $U_d$ ) can be given by

$$U_d = -\Delta G_d / ne$$

where  $n = 3$  for NRR, whereas  $n = 2$  for COR and NOR<sup>1</sup>.

Note S2. Diffusion energy barrier calculations.

The diffusion energy barriers ( $G_{bar}$ ) for the TM atom migration from the deposition site to the neighboring site are calculated by CI-NEB<sup>2</sup>, the definition of the  $G_{bar}$  is defined as follow:

$$G_{bar} = G_{TS} - G_{IS}$$

where  $G_{IS}$  and  $G_{TS}$  represent the Gibbs free energies of the initial state and transition state respectively. Taking Mo<sub>II</sub>@py-GY as a representative and its structures of initial (IS) transition (TS) and final (FS) state are plotted in Fig. S9.

Note S3. Synthetic feasibility for Mo<sub>II</sub>@py-GY in the experiment.

The wet chemical method for the experimental preparation of highly dispersed SACs is a promising approach<sup>3,4</sup>. Inspired by previous theoretical works<sup>5,6</sup>, using MoCl<sub>2</sub> as the Mo-atom precursor, the experimentally synthetic feasibility of Mo<sub>II</sub>@py-GY was evaluated by calculating the energy map as the well-designed synthetic route in Fig. S13, as described below:

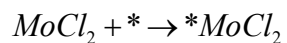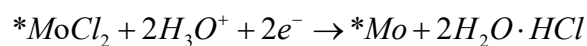

where \* represents the py-GY substrate.

**Table S1.** The binding energy  $E_b$  of TM anchored on py-GY at I and II sites, and the transferred charge Q from TM-atoms to substrate at I and II sites.

| metal | $E_b(\text{I})$ (eV) | $E_b(\text{II})$ (eV) | Q(I) ( $e^-$ ) | Q(II) ( $e^-$ ) |
|-------|----------------------|-----------------------|----------------|-----------------|
| Sc    | -4.74                | -5.32                 | 1.43           | 1.49            |
| Ti    | -3.72                | -5.25                 | 1.23           | 1.23            |
| V     | -4.15                | -4.51                 | 1.09           | 1.11            |
| Cr    | -2.61                | -3.46                 | 0.89           | 1.02            |
| Mn    | -1.48                | -3.08                 | 1.09           | 0.96            |
| Fe    | -3.95                | -3.82                 | 0.90           | 0.81            |
| Co    | -3.41                | -4.04                 | 0.87           | 0.57            |
| Ni    | -3.34                | -4.06                 | 0.51           | 0.46            |
| Cu    | -3.65                | -2.59                 | 0.64           | 0.62            |
| Y     | -4.87                | -5.49                 | 1.71           | 2.00            |
| Zr    | -5.02                | -6.43                 | 1.43           | 1.53            |
| Nb    | -5.31                | -6.75                 | 1.16           | 1.28            |
| Mo    | -3.33                | -4.36                 | 0.86           | 0.99            |
| Tc    | -4.12                | -4.81                 | 1.00           | 0.77            |
| Ru    | -4.21                | -4.70                 | 0.63           | 0.68            |
| Rh    | -4.24                | -4.28                 | 0.45           | 0.53            |
| Pd    | -3.12                | -2.65                 | 0.34           | 0.28            |
| Ag    | -2.46                | -2.46                 | 0.53           | 0.53            |
| Hf    | -4.84                | -6.33                 | 1.39           | 1.40            |
| Ta    | -4.64                | -6.67                 | 1.17           | 1.36            |
| W     | -4.17                | -5.46                 | 0.96           | 1.10            |
| Re    | -3.58                | -4.37                 | 0.97           | 0.94            |
| Os    | -4.31                | -4.90                 | 0.63           | 0.57            |
| Ir    | -4.85                | -4.93                 | 0.36           | 0.43            |
| Pt    | -4.73                | -4.00                 | 0.18           | 0.26            |
| Au    | -2.99                | -1.28                 | 0.41           | 0.41            |

**Table S2.** The adsorption Gibbs free energy  $E_{\text{abs}}$  and the TM-N and N-N bond lengths of the  $\text{N}_2$  adsorption on the TM@py-GY monolayer via end-on and side-on configurations at I site. The “/” means  $\text{N}_2$  adsorption configuration changes after structure optimization. The “//” means  $\text{N}_2$  physisorption and was not further calculated.

| TM | End-on                      |                      |                     | Side-on                     |                      |                      |                     |
|----|-----------------------------|----------------------|---------------------|-----------------------------|----------------------|----------------------|---------------------|
|    | $E_{\text{abs}}(\text{eV})$ | TM-N( $\text{\AA}$ ) | N-N( $\text{\AA}$ ) | $E_{\text{abs}}(\text{eV})$ | TM-N( $\text{\AA}$ ) | TM-N( $\text{\AA}$ ) | N-N( $\text{\AA}$ ) |
| Sc | -1.16                       | 2.15                 | 1.13                | -0.97                       | 2.22                 | 2.22                 | 1.17                |
| Ti | -0.86                       | 2.01                 | 1.14                | -0.89                       | 2.01                 | 2.02                 | 1.20                |
| V  | -0.86                       | 1.96                 | 1.14                | 0.07                        | 1.96                 | 1.96                 | 1.20                |
| Cr | 0.06                        | 2.05                 | 1.13                | /                           | /                    | /                    | /                   |
| Mn | -0.44                       | 2.08                 | 1.13                | -0.26                       | 1.99                 | 1.99                 | 1.17                |
| Fe | -0.42                       | 1.89                 | 1.13                | 0.01                        | 2.00                 | 2.05                 | 1.16                |
| Co | -0.33                       | 1.84                 | 1.13                | 0.18                        | 2.12                 | 2.14                 | 1.14                |
| Ni | -0.15                       | 1.81                 | 1.13                | /                           | /                    | /                    | /                   |
| Cu | //                          | //                   | //                  | /                           | /                    | /                    | /                   |
| Y  | -0.60                       | 2.27                 | 1.14                | -0.68                       | 2.36                 | 2.36                 | 1.17                |
| Zr | -1.05                       | 2.07                 | 1.15                | -1.09                       | 2.10                 | 2.10                 | 1.23                |
| Nb | -0.69                       | 2.03                 | 1.14                | -0.76                       | 1.94                 | 1.94                 | 1.29                |
| Mo | -0.39                       | 1.97                 | 1.14                | 0.06                        | 2.09                 | 2.09                 | 1.19                |
| Tc | -0.66                       | 1.14                 | 1.14                | -0.10                       | 2.07                 | 2.07                 | 1.18                |
| Ru | -0.87                       | 1.85                 | 1.14                | -0.28                       | 2.08                 | 2.08                 | 1.17                |
| Rh | -0.40                       | 1.87                 | 1.13                | 0.09                        | 2.16                 | 2.16                 | 1.15                |
| Pd | 0.30                        | 2.07                 | 1.12                | //                          | //                   | //                   | //                  |
| Ag | //                          | //                   | //                  | //                          | //                   | //                   | //                  |
| Hf | -0.86                       | 2.03                 | 1.15                | -1.07                       | 2.06                 | 2.06                 | 1.24                |
| Ta | -0.99                       | 1.97                 | 1.15                | -1.28                       | 1.90                 | 1.90                 | 1.30                |
| W  | -0.59                       | 1.91                 | 1.15                | -0.19                       | 2.01                 | 2.01                 | 1.23                |
| Re | -0.65                       | 1.86                 | 1.15                | 0.01                        | 1.95                 | 1.95                 | 1.24                |
| Os | -0.77                       | 1.84                 | 1.14                | -0.03                       | 2.08                 | 2.08                 | 1.18                |
| Ir | -0.33                       | 1.83                 | 1.14                | 0.36                        | 2.13                 | 2.13                 | 1.17                |
| Pt | 0.67                        | 2.04                 | 1.13                | //                          | //                   | //                   | //                  |
| Au | //                          | //                   | //                  | //                          | //                   | //                   | //                  |

**Table S3.** The adsorption Gibbs free energy  $E_{\text{abs}}$  and the TM-N and N-N bond lengths of the  $\text{N}_2$  adsorption on the TM@py-GY monolayer via end-on and side-on configurations at II site. The “/” means  $\text{N}_2$  adsorption configuration changes after structure optimization. The “//” means  $\text{N}_2$  physisorption and was not further calculated.

| TM | End-on                      |                      |                     | Side-on                     |                      |                      |                     |
|----|-----------------------------|----------------------|---------------------|-----------------------------|----------------------|----------------------|---------------------|
|    | $E_{\text{abs}}(\text{eV})$ | TM-N( $\text{\AA}$ ) | N-N( $\text{\AA}$ ) | $E_{\text{abs}}(\text{eV})$ | TM-N( $\text{\AA}$ ) | TM-N( $\text{\AA}$ ) | N-N( $\text{\AA}$ ) |
| Sc | -0.16                       | 2.35                 | 1.12                | -0.39                       | 2.22                 | 2.22                 | 1.17                |
| Ti | -0.56                       | 2.02                 | 1.14                | -0.35                       | 2.27                 | 2.20                 | 1.16                |
| V  | -0.51                       | 1.95                 | 1.13                | 0.21                        | 2.32                 | 2.20                 | 1.14                |
| Cr | 0.70                        | 1.83                 | 1.14                | /                           | /                    | /                    | /                   |
| Mn | 0.07                        | 2.18                 | 1.12                | /                           | /                    | /                    | /                   |
| Fe | -0.20                       | 1.92                 | 1.13                | 0.21                        | 2.00                 | 2.05                 | 1.15                |
| Co | -0.18                       | 1.85                 | 1.13                | /                           | /                    | /                    | /                   |
| Ni | -0.32                       | 1.83                 | 1.13                | /                           | /                    | /                    | /                   |
| Cu | 0.01                        | 1.94                 | 1.12                | /                           | /                    | /                    | /                   |
| Y  | -0.51                       | 2.32                 | 1.13                | -0.37                       | 2.37                 | 2.36                 | 1.17                |
| Zr | -0.46                       | 2.23                 | 1.13                | -0.34                       | 2.28                 | 2.26                 | 1.17                |
| Nb | -0.63                       | 2.04                 | 1.14                | -0.47                       | 2.09                 | 2.09                 | 1.21                |
| Mo | -0.54                       | 1.93                 | 1.15                | 0.16                        | 2.14                 | 2.12                 | 1.18                |
| Tc | -0.86                       | 1.85                 | 1.14                | 0.28                        | 2.17                 | 2.13                 | 1.17                |
| Ru | -0.19                       | 1.99                 | 1.13                | /                           | /                    | /                    | /                   |
| Rh | 0.42                        | 1.99                 | 1.13                | //                          | //                   | //                   | //                  |
| Pd | 0.01                        | 2.06                 | 1.12                | //                          | //                   | //                   | //                  |
| Ag | 0.26                        | 3.21                 | 1.12                | //                          | //                   | //                   | //                  |
| Hf | -0.45                       | 2.16                 | 1.14                | -0.37                       | 2.23                 | 2.20                 | 1.18                |
| Ta | -0.65                       | 2.01                 | 1.15                | -0.59                       | 2.05                 | 2.05                 | 1.23                |
| W  | -0.79                       | 1.92                 | 1.15                | -0.14                       | 2.12                 | 2.07                 | 1.20                |
| Re | -1.08                       | 1.86                 | 1.15                | 0.12                        | 2.16                 | 2.10                 | 1.18                |
| Os | -0.26                       | 1.90                 | 1.14                | /                           | /                    | /                    | /                   |
| Ir | 0.28                        | 3.20                 | 1.12                | //                          | //                   | //                   | //                  |
| Pt | -0.11                       | 2.01                 | 1.13                | //                          | //                   | //                   | //                  |
| Au | 0.29                        | 2.15                 | 1.12                | //                          | //                   | //                   | //                  |

**Table S4.** Gibbs free energy changes of  $\Delta G(*O)$ ,  $\Delta G(*OH)$ ,  $\Delta G(*O + H^+ + e^- \rightarrow *OH)$ , and  $\Delta G(*OH + H^+ + e^- \rightarrow *+H_2O)$  on  $W_I@py-GY$  and  $Mo_{II}@py-GY$ . The bold numbers represent the maximum free energy change.

| Catalysts       | $\Delta G(*O)$ | $\Delta G(*OH)$ | $\Delta G(*O + H^+ + e^- \rightarrow *OH)$ | $\Delta G(*OH + H^+ + e^- \rightarrow *+H_2O)$ |
|-----------------|----------------|-----------------|--------------------------------------------|------------------------------------------------|
|                 | eV             | eV              | eV                                         | eV                                             |
| $W_I@py-GY$     | -1.56          | -1.04           | 0.52                                       | <b>0.59</b>                                    |
| $Mo_{II}@py-GY$ | -0.84          | -0.52           | 0.31                                       | <b>0.52</b>                                    |



**Table S5.** Formation energy values of  $W_I@py-GY$  and  $Mo_{II}@py-GY$ .

| Catalyst        | $E_{form}$ (eV) | Ref.      |
|-----------------|-----------------|-----------|
| $W_I@py-GY$     | -1.10           | this work |
| $Mo_{II}@py-GY$ | -2.13           | this work |
| Fe/N-G          | 2.26            | 7         |
| Co/N-G          | 2.27            | 8         |
| Pt/g- $C_3N_4$  | 2.88            | 9         |

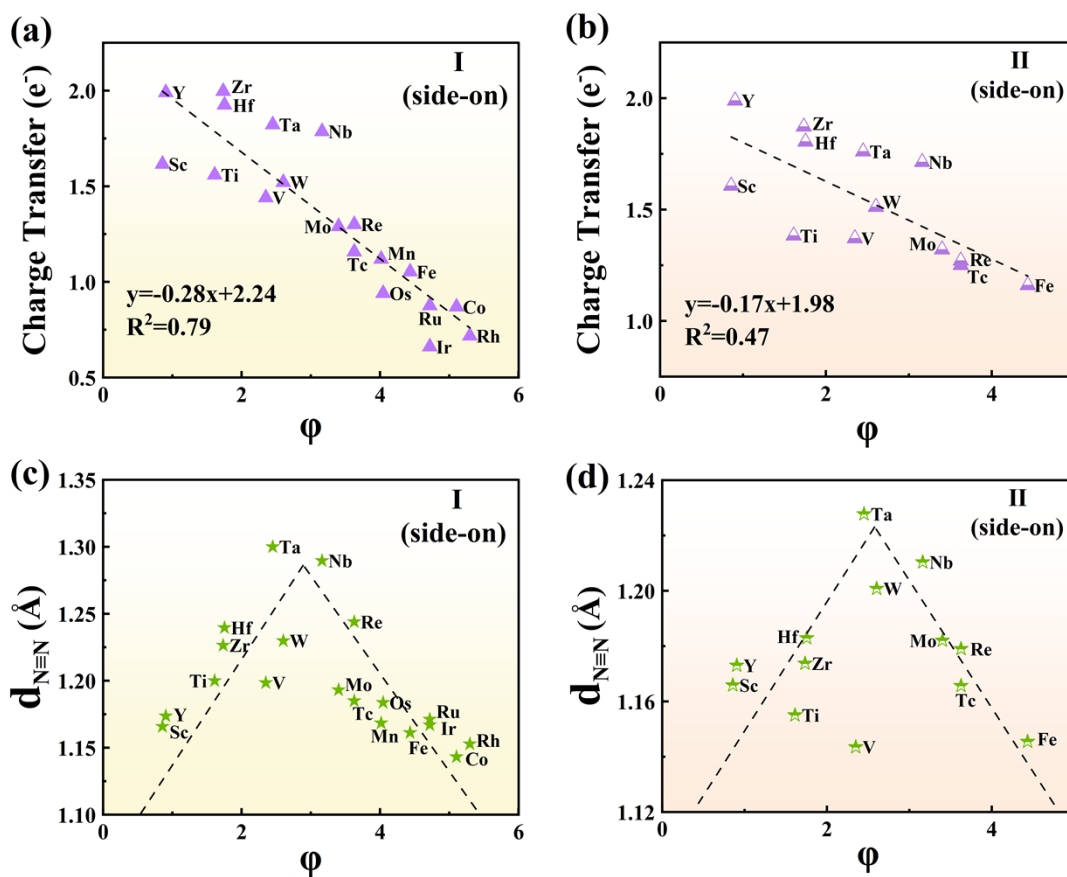

**Fig. S1.** The linear relationship between the descriptor  $\phi$  and charge transfer from the metal to  $N_2$  adsorption via the side-on configuration at (a) I and (b) II sites. Relationships between the descriptor  $\phi$  versus the bond length of  $N\equiv N$  ( $d_{N\equiv N}$ ) at (c) I and (d) II sites.

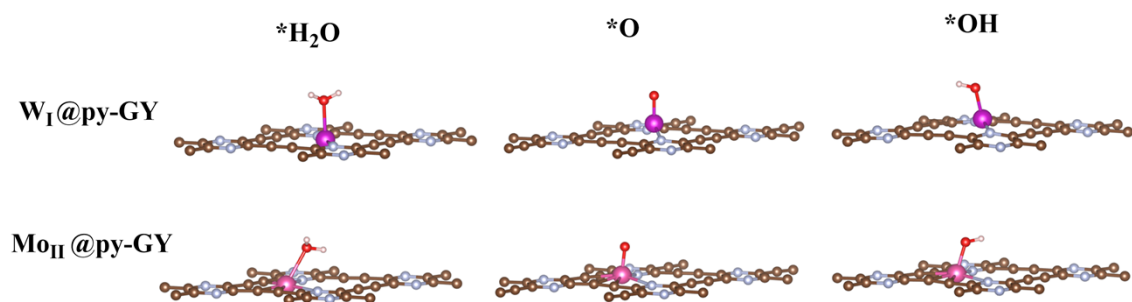

**Fig. S2.** Optimized structures of  $*\text{H}_2\text{O}$ ,  $*\text{O}$ , and  $*\text{OH}$  adsorption on  $\text{W}_\text{I}@\text{py-GY}$  and  $\text{Mo}_\text{II}@\text{py-GY}$  catalysts.

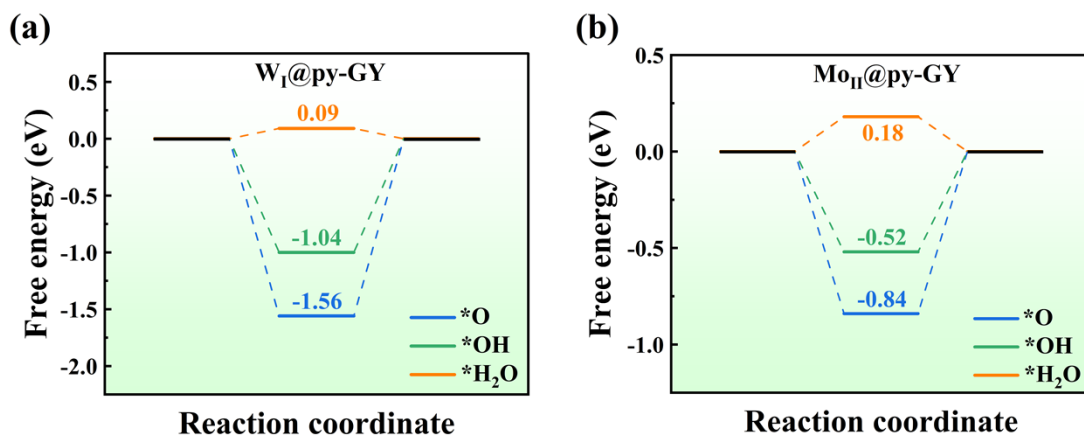

**Fig. S3.** The Gibbs free energy diagram of  $\text{*H}_2\text{O}$ ,  $\text{*O}$  and  $\text{*OH}$  adsorption on (a)  $\text{W}_I@py\text{-GY}$  and (b)  $\text{Mo}_{II}@py\text{-GY}$ .

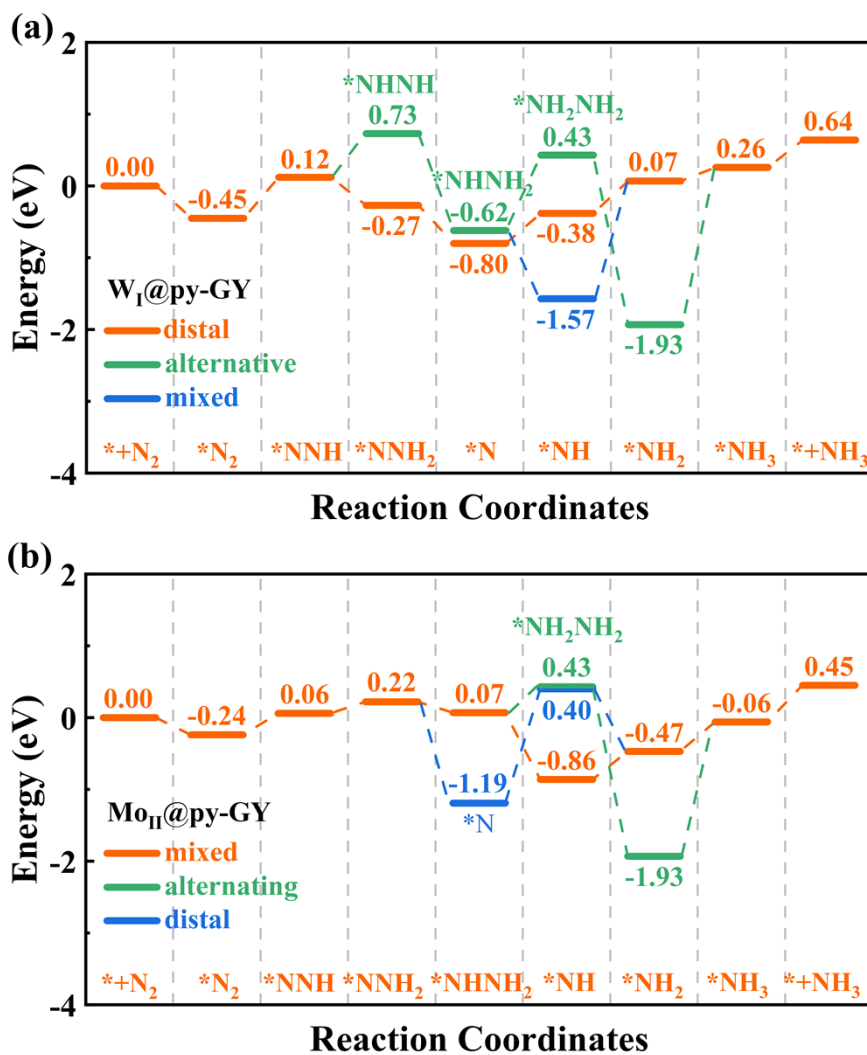

**Fig. S4.** Free-energy profiles of NRR at different applied potentials on (a) W<sub>I</sub>@py-GY, and (b) Mo<sub>II</sub>@py-GY.

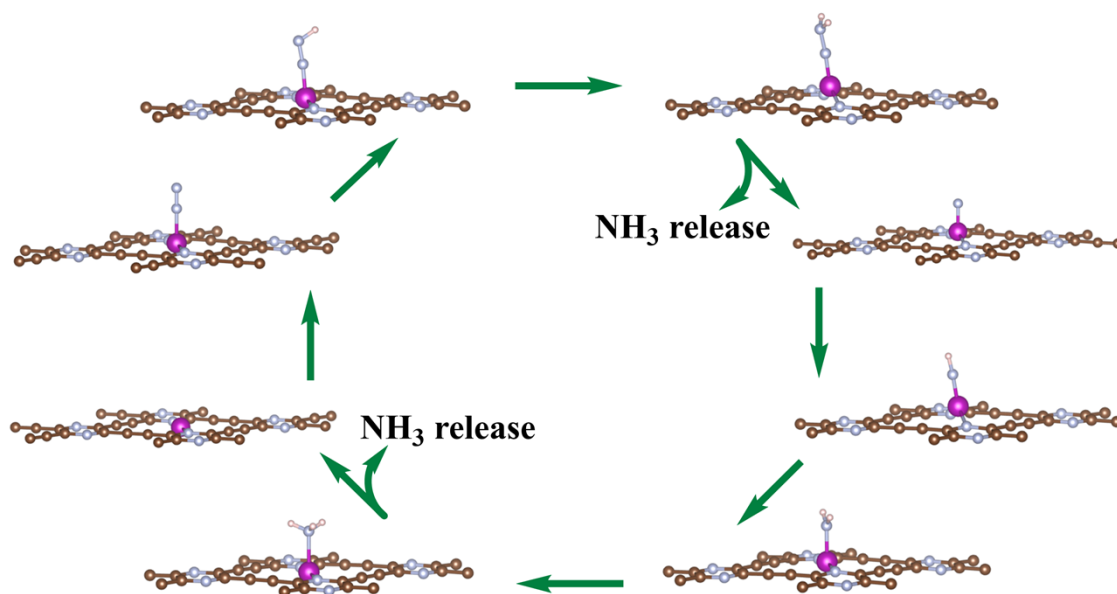

**Fig. S5.** Adsorption configurations of different species during the reaction on  $W_1@py$ -GY surface.

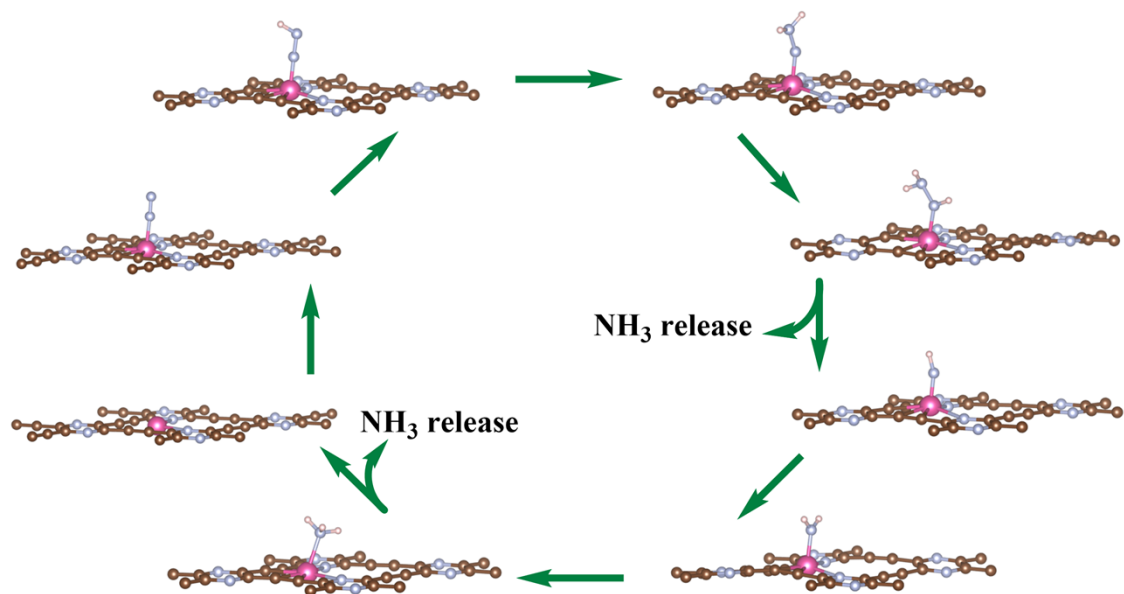

**Fig. S6.** Adsorption configurations of different species during the reaction on Mo<sub>11</sub>@py-GY surface.

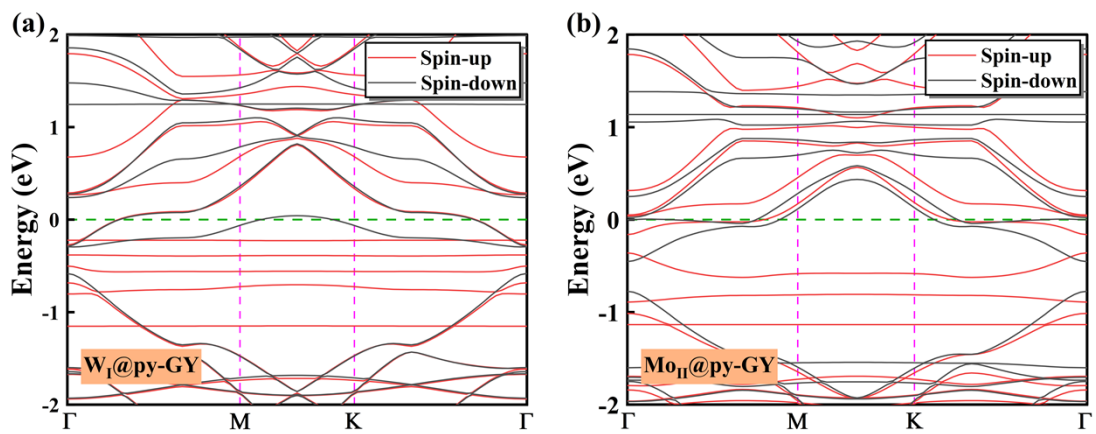

**Fig. S7.** Band structures of (a)  $W_1@py-GY$  and (b)  $Mo_{II}@py-GY$ .



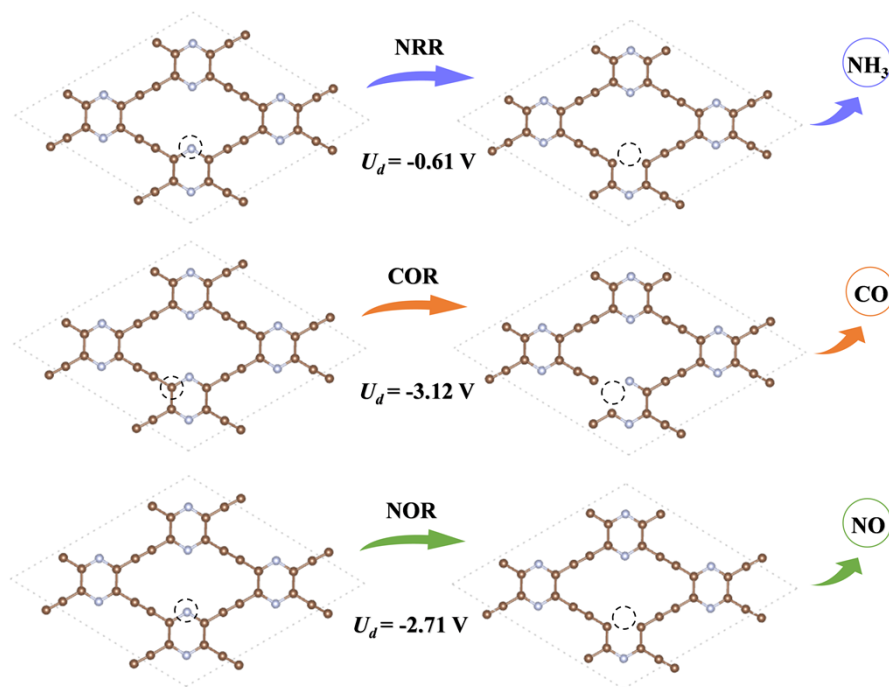

**Fig. S8.** The required potentials of electrochemical decomposition for nitrogen reduction reaction (NRR) carbon oxidation reaction (COR) and nitrogen oxidation reaction (NOR) on py-GY.

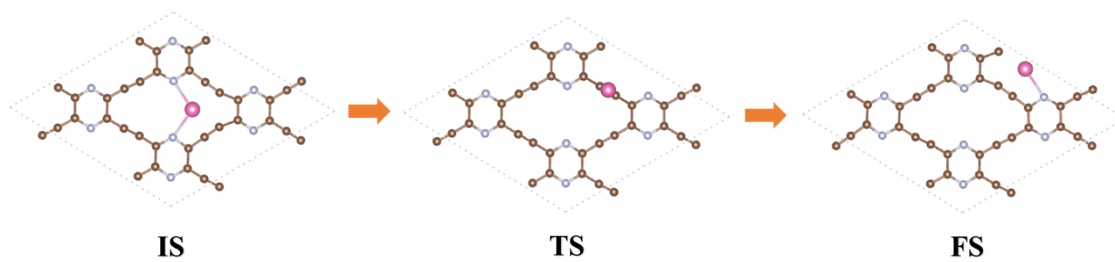

**Fig. S9.** The atomic structures of the initial state (IS) transition state (TS) and final state (FS) during the TM-atom migration from the deposition site to the neighboring site taking  $\text{Mo}_{\text{II}}@_{\text{py}}\text{-GY}$  as an example.

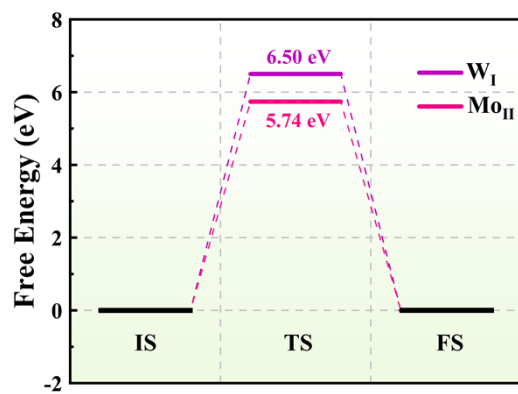

**Fig. S10.** Diffusion energy barriers of  $W_I$ ,  $Mo_{II}$  from the deposition site of py-GY to neighboring site.

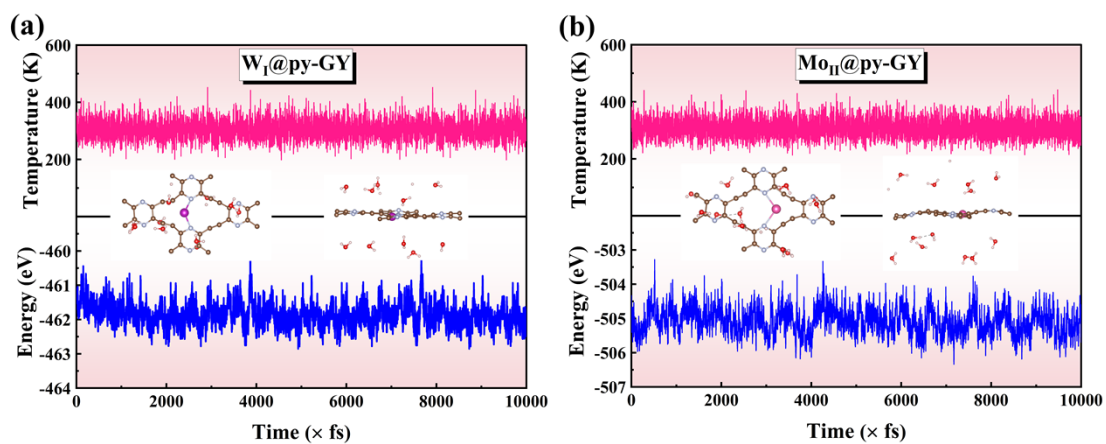

**Fig. S11.** Energy fluctuations of (a)  $W_I@py-GY$  and (b)  $Mo_{II}@py-GY$  against the time in AIMD simulations at 300 K. To simulate the acidic aqueous solution, the explicit solvent model (about two  $H_2O$  layers) is used and two H atoms are added simulate the acidic aqueous solution.

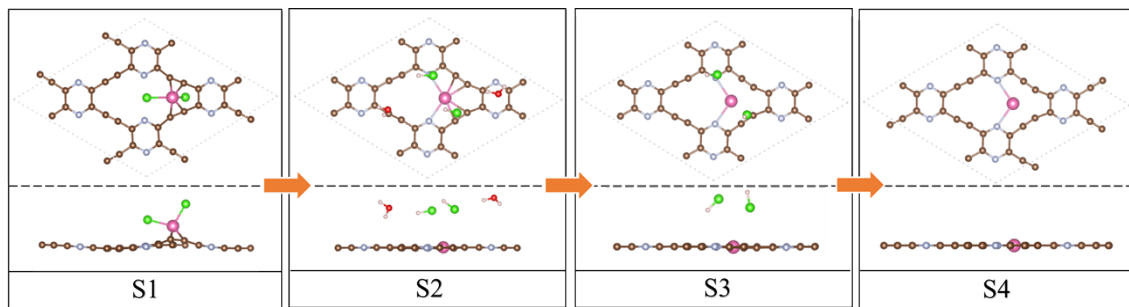

**Fig. S12.** The designed synthetic route for Mo<sub>11</sub>@py-GY. Green and red atoms correspond to Cl and O atoms, respectively.

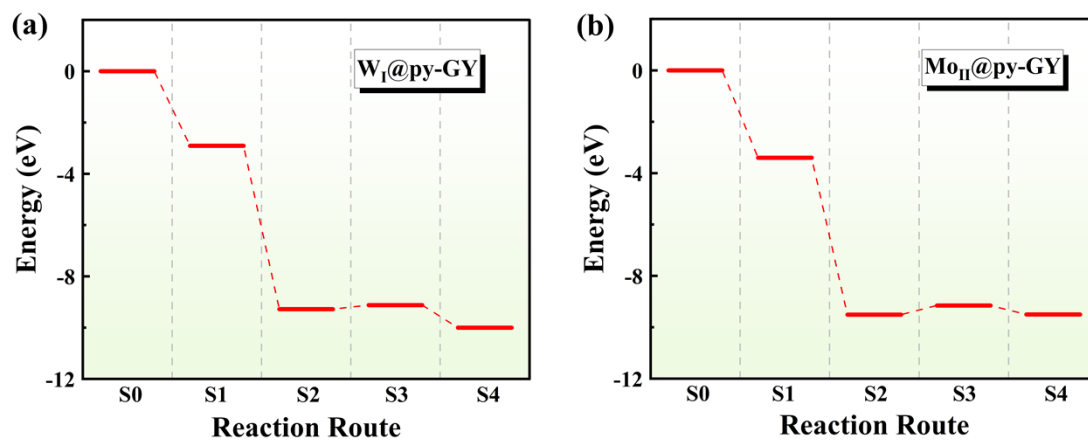

**Fig. S13.** The energy map along the synthetic route, where S0 denotes the pristine py-GY.

## References

- [1] X. Lv, W. Wei, H. Wang, B. Huang and Y. Dai, *Appl. Catal., B.*, 2020, 264, 118521.
- [2] J. Wu, J.-H. Li and Y.-X. Yu, *ACS Appl. Mater. Interfaces*, 2021, 13, 10026–10036.
- [3] B. Qiao, A. Wang, X. Yang, L. F. Allard, Z. Jiang, Y. Cui, J. Liu, J. Li and T. Zhang, *Nat. Chem.*, 2011, 3, 634–641.
- [4] X.-F. Yang, A. Wang, B. Qiao, J. Li, J. Liu and T. Zhang, *Acc. Chem. Res.*, 2013, 46, 1740–1748.
- [5] X. Lv, W. Wei, B. Huang, Y. Dai and T. Frauenheim, *Nano Lett.*, 2021, 21, 1871–1878.
- [6] C. Ling, L. Shi, Y. Ouyang, X. C. Zeng and J. Wang, *Nano Lett.*, 2017, 17, 5133–5139.
- [7] D. Deng, X. Chen, L. Yu, X. Wu, Q. Liu, Y. Liu, H. Yang, H. Tian, Y. Hu, P. Du, R. Si, J. Wang, X. Cui, H. Li, J. Xiao, T. Xu, J. Deng, F. Yang, P. N. Duchesne, P. Zhang, J. Zhou, L. Sun, J. Li, X. Pan and X. Bao, *Sci. Adv.*, 2015, 1, e1500462.
- [8] H. Fei, J. Dong, M. J. Arellano-Jiménez, G. Ye, N. Dong Kim, E. L. G. Samuel, Z. Peng, Z. Zhu, F. Qin, J. Bao, M. J. Yacaman, P. M. Ajayan, D. Chen and J. M. Tour, *Nat. Commun.*, 2015, 6, 8668.
- [9] Z. Li, M. Li, J. Yang, M. Liao, G. Song, J. Cao, F. Liu, Z. Wang, S. Kawi and Q. Lin, *Catal. Today*, 2022, 388–389, 12–25.
